# Supplementary material for: Minimal mechanistic component of HbYX-dependent proteasome activation that reverses impairment by neurodegenerative-associated oligomers
Source: PubMed Central journal article supplement (PMC10349142; doi:10.1038/s42003-023-05082-9), 2023-07-14
Supplement: 42003_2023_5082_MOESM2_ESM.pdf [file 42003_2023_5082_MOESM2_ESM.pdf]

## Description of Additional Supplementary Files

**File name:** Supplementary Data

**Description:** Source data includes excel file with tabs for each figure in manuscript. Source data for each figure includes individual data for enzymatic rates output by the Biotek Synergy plate reader.
